# Supplementary material for: Integrated bioinformatics and experiment revealed that cuproptosis is the potential common pathogenesis of three kinds of primary cardiomyopathy
Source: Aging (Albany NY). 2023 Dec 11;15(23):14210–41. doi: 10.18632/aging.205298 (PMC10756114; doi:10.18632/aging.205298)
Supplement: Supplementary Figures [file aging-15-205298-s001.pdf]

SUPPLEMENTARY FIGURES

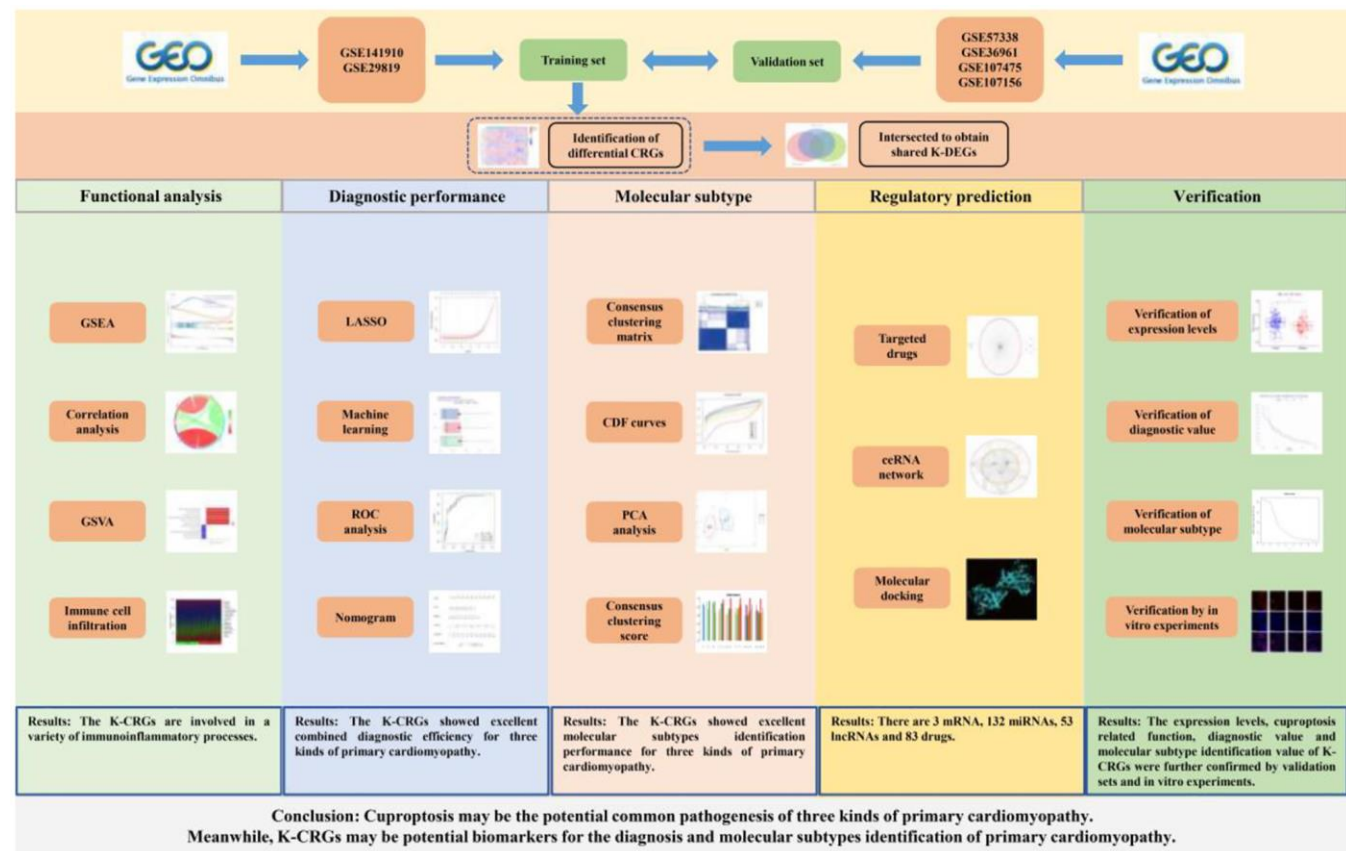

Supplementary Figure 1. The flowchart of this study.

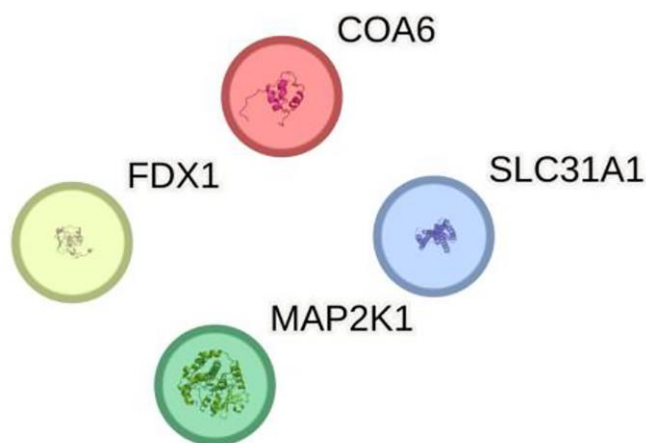

Supplementary Figure 2. The PPI network of four CRGs shared by the three kinds of primary cardiomyopathy.

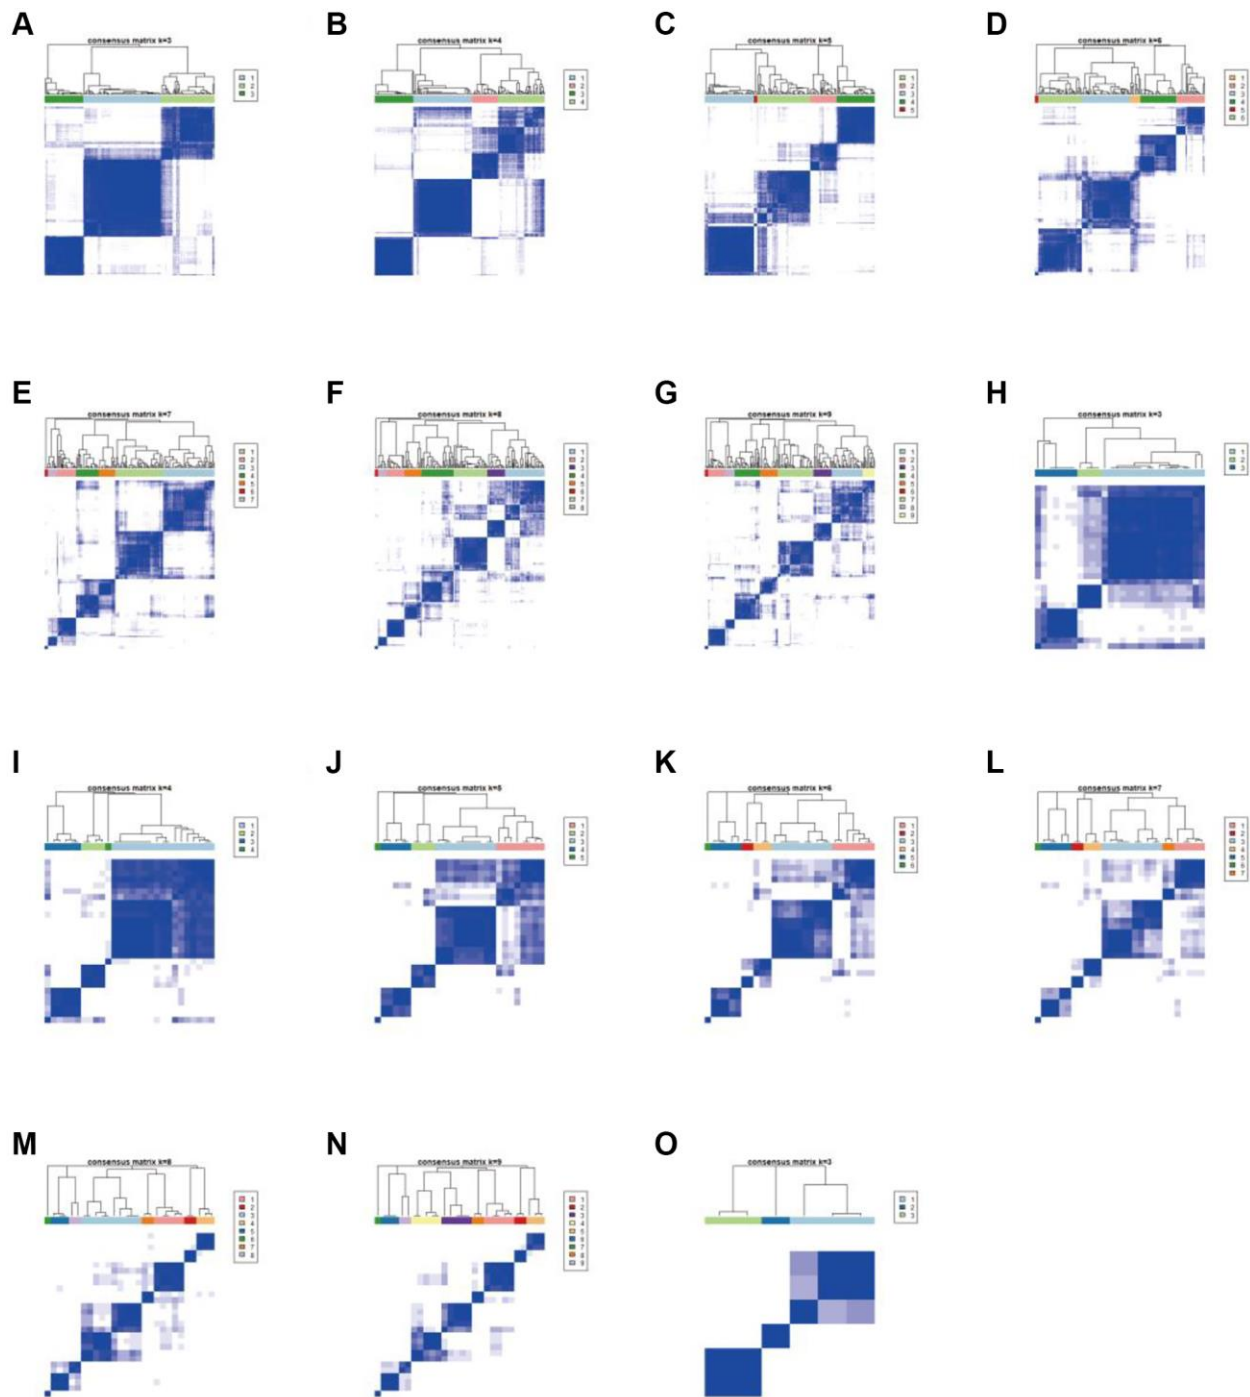

**Supplementary Figure 3. The consensus clustering matrix of three kinds of primary cardiomyopathy when  $k = 3-9$ . (A–G)  $k = 3-9$  of DCM. (H–N)  $k = 3-9$  of HCM. (O)  $k = 3$  of ARVC.**

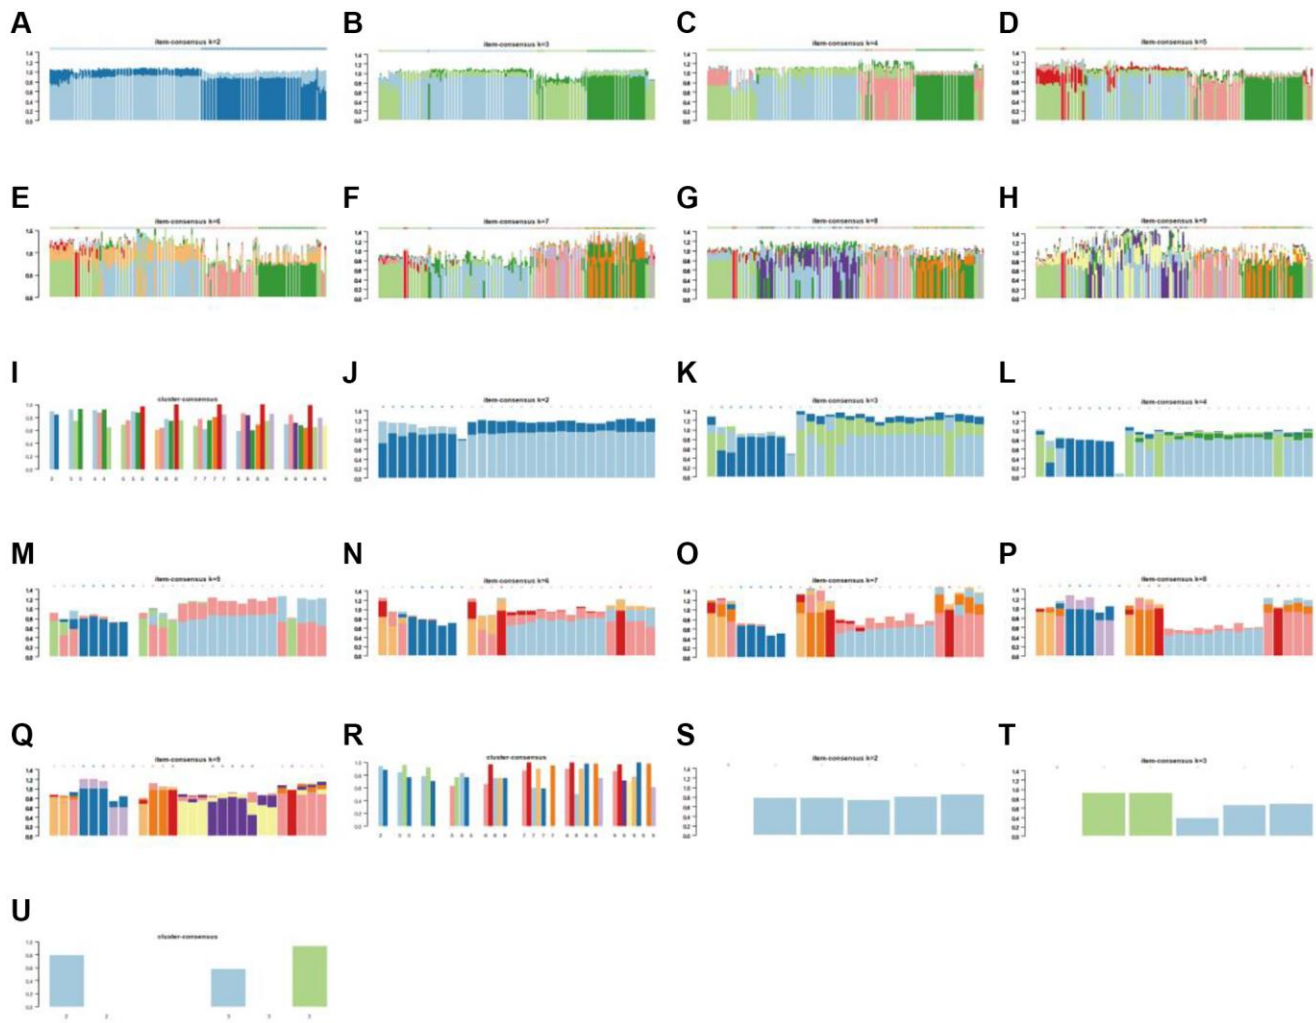

**Supplementary Figure 4. The item and score of consensus clustering of three kinds of primary cardiomyopathy when  $k = 2 - 9$ .** (A–H) The item of consensus clustering of DCM when  $k = 2 - 9$ . (I) The score of consensus clustering of DCM when  $k = 2 - 9$ . (J–Q) The item of consensus clustering of HCM when  $k = 2 - 9$ . (R) The score of consensus clustering of HCM when  $k = 2 - 9$ . (S, T) The item of consensus clustering of ARVC when  $k = 2 - 3$ . (U) The score of consensus clustering of ARVC when  $k = 2 - 3$ .

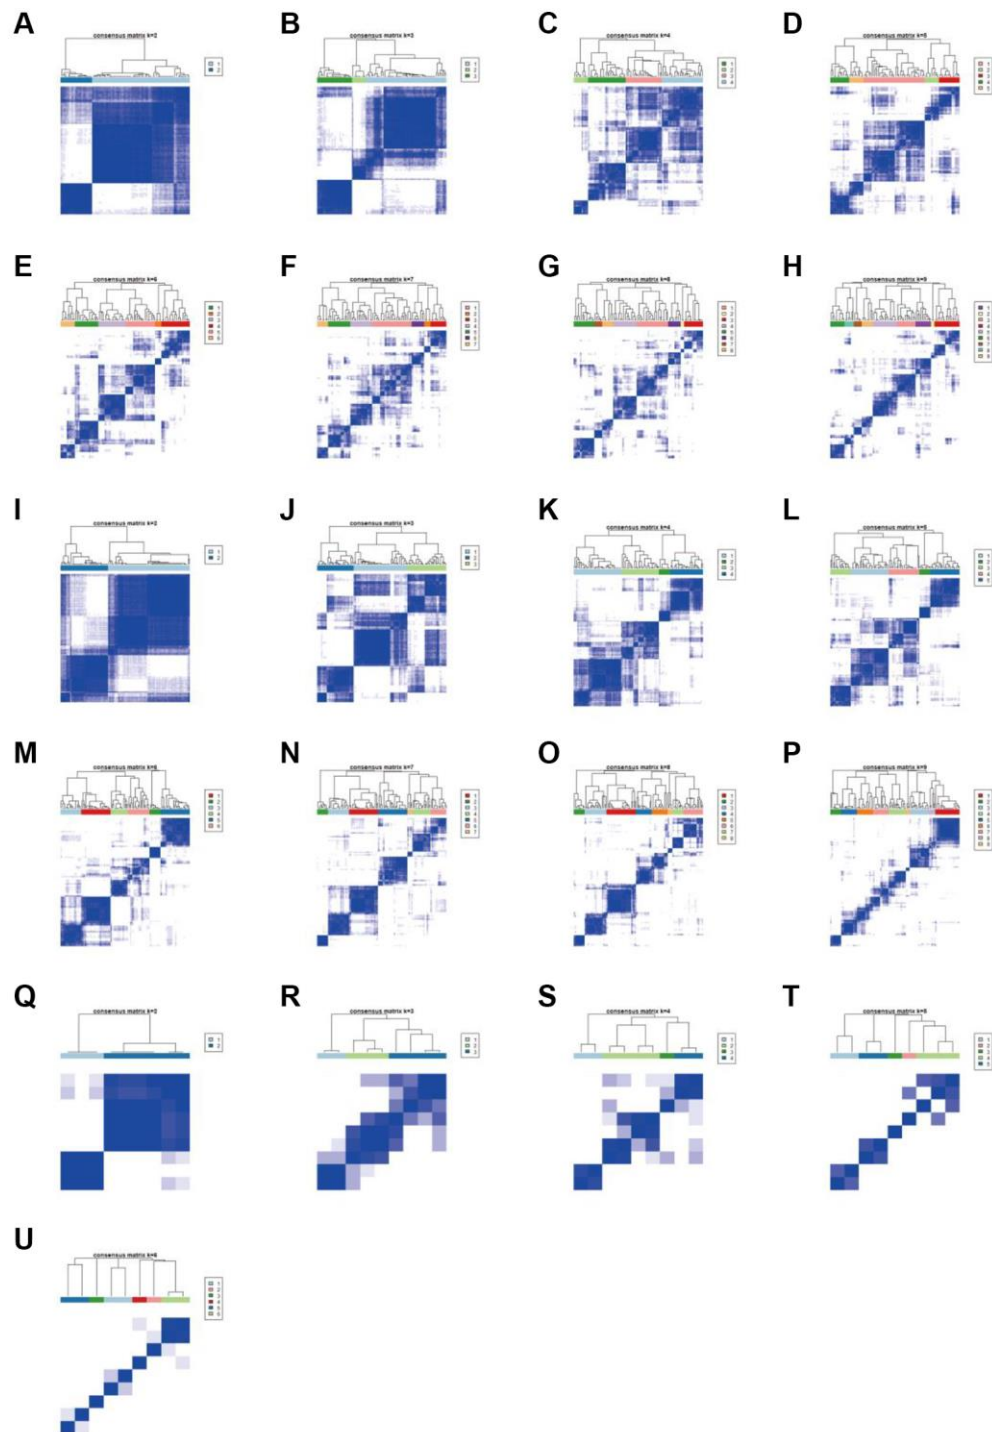

**Supplementary Figure 5. The consensus clustering matrix of three kinds of primary cardiomyopathy when  $k = 2 - 9$  in the validation set. (A–H)  $k = 2 - 9$  of DCM. (I–P)  $k = 2 - 9$  of HCM. (Q–U)  $k = 2 - 6$  of ARVC.**

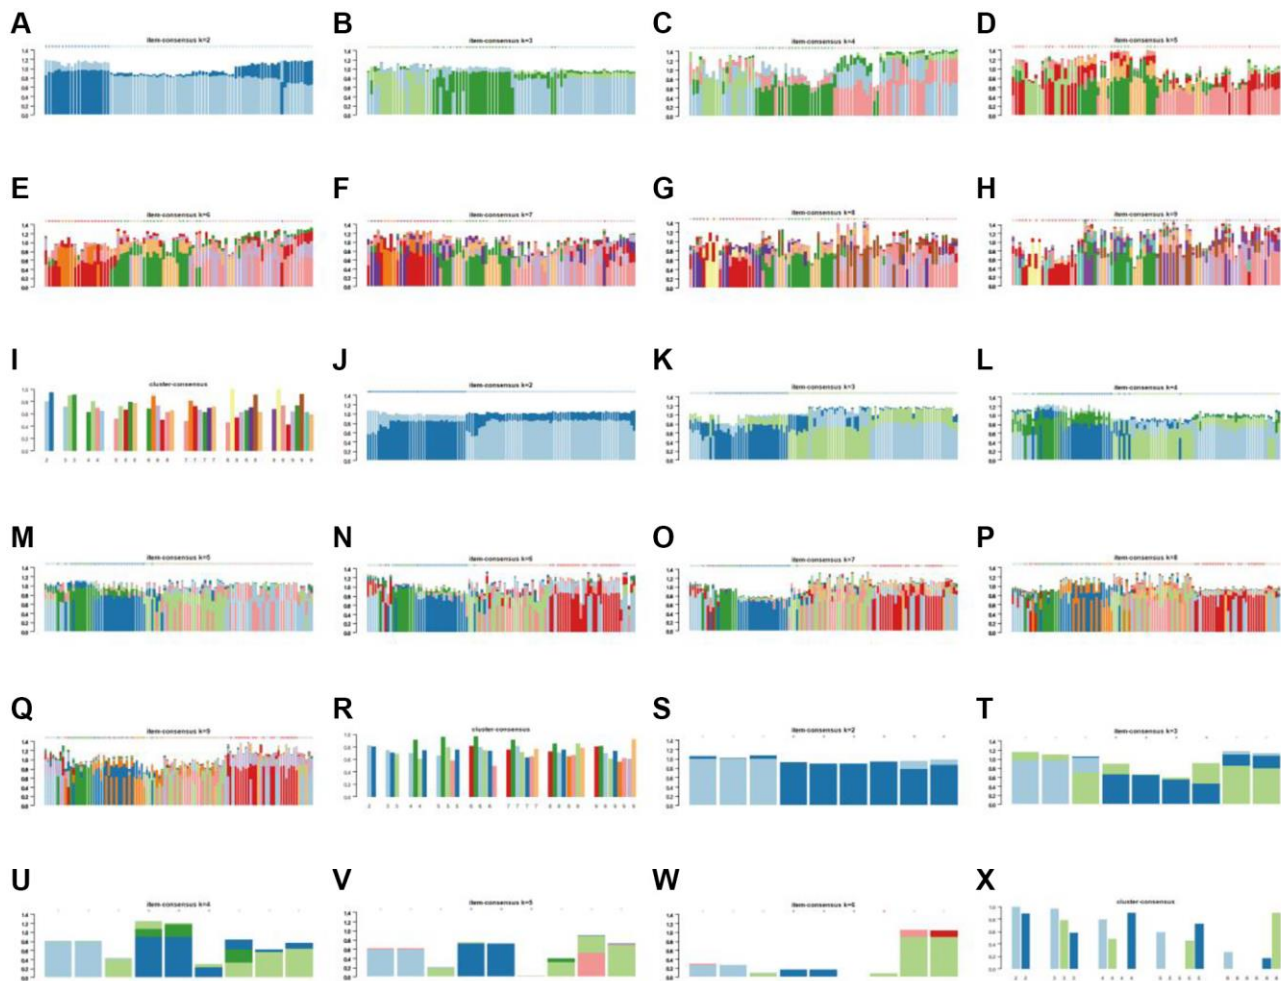

**Supplementary Figure 6. The item and score of consensus clustering of three kinds of primary cardiomyopathy when  $k = 2 - 9$  in the validation set. (A–H) The item of consensus clustering of DCM when  $k = 2 - 9$ . (I) The score of consensus clustering of DCM when  $k = 2 - 9$ . (J–Q) The item of consensus clustering of HCM when  $k = 2 - 9$ . (R) The score of consensus clustering of HCM when  $k = 2 - 9$ . (S–W) The item of consensus clustering of ARVC when  $k = 2 - 6$ . (X) The score of consensus clustering of ARVC when  $k = 2 - 6$ .**
