# Supplementary material for: Integrated bioinformatics and experiment revealed that cuproptosis is the potential common pathogenesis of three kinds of primary cardiomyopathy
Source: publisher site journal article supplement (doi:10.18632/aging.205298), 2023-12-11
Supplement: Supplementary file [file aging-v15i23-205298-supplementary-material-SD2.pdf]

## SUPPLEMENTARY TABLES

**Supplementary Table 1. Summary of six GEO datasets.**

| Name      | Disease type | Disease samples | Control samples | Group          |
|-----------|--------------|-----------------|-----------------|----------------|
| GSE141910 | DCM          | 166             | 166             | Training set   |
| GSE141910 | HCM          | 28              | 166             | Training set   |
| GSE29819  | ARVC         | 6               | 6               | Training set   |
| GSE57338  | DCM          | 82              | 136             | Validation set |
| GSE36961  | HCM          | 106             | 39              | Validation set |
| GSE107475 | ARVC         | 9               | 0               | Validation set |
| GSE107156 | ARVC         | 0               | 5               | Validation set |

Abbreviations: DCM: dilated cardiomyopathy; HCM: hypertrophic cardiomyopathy; ARVC: arrhythmogenic right ventricular cardiomyopathy.

**Supplementary Table 2. Summary of CRGs symbol.**

| CRGs ID  |        |         |
|----------|--------|---------|
| AOC3     | LOXL2  | SCO2    |
| ATOX1    | MAP2K1 | SLC25A3 |
| ATP7A    | MAP2K2 | SLC31A1 |
| ATP7B    | MT1A   | SLC31A2 |
| CCL8     | MT1B   | SOD1    |
| CCS      | MT1E   | TYR     |
| CD274    | MT1F   | UBE2D1  |
| CDKN2A   | MT1G   | UBE2D2  |
| COA6     | MT1H   | UBE2D3  |
| COX11    | MT1M   | UBE2D4  |
| COX17    | MT1X   | ULK1    |
| CP       | MT2A   | ULK2    |
| DBH      | MT-CO1 | VEGFA   |
| DLAT     | MT-CO2 | NFE2L2  |
| DLD      | MTF1   | NLRP3   |
| FDX1     | PDE3B  | LIPT2   |
| GLS      | PDHA1  | DLST    |
| HIST1H3A | PDHB   | DBT     |
| LIAS     | PDK1   | GCSH    |
| LIPT1    | SCO1   |         |

**Supplementary Table 3. Primer sequences.**

| <b>Name</b> | <b>Species</b> | <b>Forward primer</b>   | <b>Reverse primer</b>  |
|-------------|----------------|-------------------------|------------------------|
| FDX1        | Human          | TTCAACCTGTCACCTCATCTTTG | TGCCAGATCGAGCATGTCATT  |
| MAP2K1      | Human          | CAATGGCGGTGTGGTGTTT     | GATTGCGGGTTTGATCTCCAG  |
| SLC31A1     | Human          | GGGGATGAGCTATATGGACTCC  | TCACCAAACCGGAAAACAGTAG |
| GAPDH       | Human          | GGACCTGACCTGCCGTCTAG    | GTAGCCCAGGATGCCCTTGA   |
